# Supplementary material for: Clinical exome sequencing data reveal high diagnostic yields for congenital diaphragmatic hernia plus (CDH+) and new phenotypic expansions involving CDH
Source: HighWire-hosted journal article supplement (doi:10.1136/jmedgenet-2020-107317), 2021-01-18
Supplement: jmedgenet-2020-107317supp001_data_supplement.xlsx [file jmedgenet-2020-107317supp001_data_supplement.xlsx]

## Sheet: For Daryl
ID	Sex	Age	Phenotype and Family History	CHD?	Gene	DNA Variant	Protein Change	Inheritance	Variant Interpretation	ACMG Criteria	Associated Diagnosis	Certainty
1	F	4 days	Possible diaphragmatic hernia, double outlet right ventricle with subaortic ventricular septal defect, omphalocele, unusual scalp wound, two vessel umbilical cord, and mild dysmorphic features.	Yes	ABL1	c.352T>C [NM_007313.2]	p.(W118R)	De Novo	Likely pathogenic	PS2,PM2	Congenital heart defects and skeletal malformations syndrome (MIM #617602)	Probable
2*[1]	M	11 months	Diaphragmatic hernia, intrauterine growth restriction, microcephaly, failure to thrive, dysmorphic features, short stature, pectus excavatum, bilateral camptodactyly of the 5th finger, 2-3 toe syndactyly, thin and wrinkled skin, and cutis marmoratum. Parents are consanguineous.	No	ABL1	c.1066G>A [NM_007313.2]	p.(A356T)	De Novo	Pathogenic (published)	PS2,PS3,PM2,PP3	Congenital heart defects and skeletal malformations syndrome (MIM #617602)	Definitive
3*[1]	M	5.2 years	Diaphragmatic hernia, failure to thrive, a large ventricular septal defect, mild coarctation of the aorta, scoliosis, and significant pectus excavatum, mild chronic encephalopathy, stretch skin, chronic constipation, reflux, and some minor dysmorphic features.	Yes	ABL1	c.734A>G [NM_007313.2]	p.(Y245C)	De Novo	Pathogenic (published)	PS2,PS3,PS4,PM2,PP3	Congenital heart defects and skeletal malformations syndrome (MIM #617602)	Definitive
4*[2]	F	6.8 years	Diaphragmatic hernia, prematurity and intrauterine growth restriction, global developmental delay, mild facial dysmorphism, esotropia, hypotonia, failure to thrive, obstructive sleep apnea, gastroesophageal reflux disease, central sleep apnea, clinodactyly of fifth fingers bilaterally, and mild flexion contracture of bilateral knees. One sibling of this individual also has global developmental de…	No	ADAT3	c.[586_587delinsTT];[c.587C>T] [NM_138422.4]	p.[(A196L)];[(A196V)]	Trans	VUS/VUS (published)	PM2,PP3;PP3	Mental retardation, autosomal recessive 36; (MIM #615286)	Definitive
5	U	Fetus	Diaphragmatic hernia, ventricular septal defect, cystic hygroma, ventriculomegaly, absent cerebellar vermis, abnormal cerebellar shape, posterior fossa cyst, single umb artery, and micrognathia.	Yes	ALG12	c.[437G>A];[c.930_931delAC] [NM_024105.4]	p.[(R146Q)];[(R311fs)]	Trans	Pathogenic/Pathogenic	PS3,PS4,PM3,PP3;PVS1,PM2,PM3	ALG12-CDG (MIM #607143)	Probable
6	M	Fetus	Diaphragmatic hernia, skeletal abnormalities (delayed ossification of the cervical vertebrae, broadening of the spinal canal, rib hypoplasia, bilateral anterior flexion of the wrists, club feet, widely spaced digits, and hypoplasia of the distal phalanges), dysmorphic features (brachycephaly, hypertelorism, wide depressed nasal bridge, wide mouth, and retrognathia), and brain abnormalities (globu…	No	ALG12	c.[165C>A];[c.437G>A] [NM_024105.4]	p.[(Y55*];[(R146Q)]	Trans	Pathogenic/Pathogenic	PVS1,PM2,PM3;PS3,PS4,PM3,PP3	ALG12-CDG (MIM #607143)	Definitive
7	M	7y	Left diaphragmatic hernia, spina bifida, segmental vertebral anomalies, rib anomalies, patent ductus arteriosus, left upper limb cavernous hemangioma (strawberry), dysmorphic features and neurogenic bladder. Parents are consanguineous and there is a brother with similar facial features.	No	ANKRD11	c.1372C>T [NM_001256183.2]	p.(R458*)	Paternal	Pathogenic	PVS1,PM3,PP1	KBG syndrome (MIM #148050)	Definitive
8	M	4y	Diaphragmatic hernia motor developmental delay, speech delay, intellectual disability, hypotonia, facial dysmorphia, short stature, hyperextensibility of digits, joint contractures, failure to thrive, hydrocephalus due to hemorrhage, abnormal retinal vasculature, dilated aortic root, recurrent fractures, severe scoliosis, cervial spine instability, marked arachnodactyly, atrophic scars, failure t…	No	B3GALT6	c.[929A>G];[c.795A>C] [NM_080605.4]	p.[(Y310C)];[(E265D)]	Trans	VUS/VUS	PP3;PS4,PP3	Ehlers-Danlos syndrome, spondylodysplastic type, 2 (MIM #615349)	Provisional
					IDS	c.1144G>C [NM_000202.8] (Hemi)	p.(D382H)	Maternal	VUS	PP3	Mucopolysaccharidosis II (MIM #309900)	Provisional
9	F	7d	Diaphragmatic eventraion with pulmonary hypoplasia, ambiguous genitalia, anal atresia, multicystic/dysplastic kidneys, hypotonia, decreased muscle mass, dysmorphic features, microcephaly, eye anomalies (iris coloboma, sclerocornea), congenital heart disease, prematurity, intrauterine growth restriction, brain MRI findings of hydrocephalus with aqueductal stenosis and hypoplasia of the cerebellum …	Yes	BRCA2	c.[4965C>G];[7007G>C] [NM_000059.4]	p.[(Y1655*)];[(R2336P)]	Trans	Pathogenic/Pathogenic	PVS1,PS4,PM3;PS1,PS3,PM3,PP3,PP5	Fanconi anemia, complementation group D1 (MIM #605724)	Definitive
10	U	Fetus	Possible diaphragmatic hernia, cystic hygroma, cutaneous edema.	No	DDX3X	c.1304T>C [NM_001193416.3]	p.(L435P)	De Novo	Likely pathogenic	PS2,PM2,PP3	Intellectual developmental disorder, X-linked, syndrome, Snijders Blok type (MIM #300958)	Probable
11	F	3y	Abnormality of the diaphragm, failure to thrive, recurrent respiratory infections, oropharyngeal dysphagia, cardiovascular abnormalities, motor and speech delays, and mild dysmorphic facial features.	Yes	EP300	c.2660C>T [NM_001429.4] Mosaic 12%	p.(T887I) Mosaic	De Novo	Pathogenic	PS2,PM2,PP3	Rubinstein-Taybi syndrome 2 (MIM #613684)	Probable
12	F	15y	Congenital diaphragmatic hernia, delayed bone age, scoliosis, congenital hip and acetabular dysplasia, poor wound healing, no puberty or menarche, hyperinsulinemia, hypoglycemia, IGF-1 deficiency, short stature, dislocated thumbs, joint laxity, failure to thrive, anemia, delayed motor milestones, delayed speech, extensive attention deficit hyperactivity disorder, behavioral problems, anxiety and …	No	EP300	c.3592T>C [NM_001429.4]	p.(Y1198H)	?	VUS	PM2	Rubinstein-Taybi syndrome 2 (MIM #613684)	Provisional
					DKC1	c.-142C>G [NM_001363.4] (Het)	p.?	?	Pathogenic	PS3,PS4,PP3,PP5	Dyskeratosis congenita, X-linked (MIM #305000)	Provisional
					SOS1	c.3298G>T [NM_005633.4]	p.(D1100Y)	?	VUS	PM2	Noonan syndrome 4 (MIM #610733)	Provisional
13	M	10d	Left-sided diaphragmatic hernia, pulmonary hypertension, mild dysmorphic features, imperforate anus, and history of single umbilical artery and hydronephrosis.	No	FANCI	c.2422A>T [NM_001113378.2]	p.(K808*)	Maternal	Pathogenic	PVS1,PS4	Fanconi anemia, complementation group I (MIM #609053)	Provisional
14*[3]	F	3y	Congenital diaphragmatic hernia, dysmorphic features, developmental delay, autism, hypotonia, relative macrocephaly with frontal bossing, failure to thrive, recurrent umbilical hernia, pectus carinatum, and joint laxity.	No	FBN1	c.4786C>T [NM_000138.5]	p.(R1596*)	De Novo	Pathogenic (published)	PVS1,PS2,PS4,PM2	Marfan syndrome (MIM #154700)	Definitive
					TRPS1	c.1630C>T [NM_014112.5]	p.(R544*)	De Novo	Pathogenic (published)	PVS1,PS2,PS4,PM2	Trichorhinophalangeal syndrome type I (MIM #190350)	Definitive
15	M	18m	Cleft palate, Pierre-Robin sequence causing respiratory obstruction, mild dysmorphisms, irritability, increased axial tone, back arching, delayed speech and prematurity. An identical male twin had diaphragmatic hernia, Tetralogy of Fallot, pulmonary valve atresia, anemia, thrombocytopenia, and hypercalcemia and died at 11 days of life.	Yes	FOXC2	c.563_573del [NM_005251.3]	p.(P188fs)	Not Maternal	Pathogenic	PVS1,PM2,PP4	Lymphedema-distichiasis syndrome (MIM #153400)	Definitive
16	M	14d	Congenital diaphragmatic hernia, horseshoe kidney, and suspicion of pulmonary hypertension and mildly hypoplastic left sided heart structures.	Yes	FOXP1	c.1718_1722+8del [NM_032682.5]	p.?	De Novo	Pathogenic	PVS1,PS2,PM2	Mental retardation with language impairment and with or without autistic features (MIM #613670)	Definitive
17	U	Fetus	Left diaphragmatic hernia, dextroposition, agenesis of corpus callosum, bilateral adducted thumbs.	No	HCCS	c.308_309insAGT [NM_001122608.3]	p.(V103dup)	De Novo	Likely Pathogenic	PM2,PM4,PP3	Linear skin defects with multiple congenital anomalies 1 (MIM #309801)	Probable
18	u	Fetus	Diaphragmatic weakening suspicious for potential hernia, single umbilical artery, abdominal ascites, mild pericardial effusion, polyhydramnios, multiple intracardiac echogenic foci, suspicion for a left renal double collecting system, suspicion for a lumbar hemivertebrae, skin edema and cystic hygroma.	No	KMT2D	c.1967delT [NM_003482.4]	p.(L656fs)	?	Likely Pathogenic	PVS1,PM2	Kabuki syndrome 1 (MIM #147920)	Probable
19	F	6m	Eventration of right diaphragm, ectopic kidney, failture to thrive, congenital heart disease, dysmorphic features, and hypoplasia of fifth finger nails. Parents are consanguineous.	Yes	KMT2D	c.10258dupA [NM_003482.4]	p.(I3420Nfs)	De Novo	Pathogenic	PVS1,PS2,PM2	Kabuki syndrome 1 (MIM #147920)	Definitive
20	M	8m	Congenital diaphragmatic hernia, delayed motor milestones, dysmorphic features, microcephaly, patent foramen ovale, failure to thrive, hypotonia, joint hypermobility, soft skin, and micropenis.	No	KMT2D	c.13543dupA [NM_003482.4]	p.(R4515Kfs)	De Novo	Pathogenic	PVS1,PS2,PM2	Kabuki syndrome 1 (MIM #147920)	Definitive
21	M	6m	Congenital diaphragmatic hernia, single umbilical artery, coarctation of aorta, pneumonia, and respiratory distress and dysmorphic features.	Yes	KMT2D	c.7613dupT [NM_003482.4]	p.(Q2540Sfs)	De Novo	Pathogenic	PVS1,PS2,PM2	Kabuki syndrome 1 (MIM #147920)	Definitive
22	M	2y	Diaphragmatic hernia, delayed motor milestones, absent speech, hypotonia, dysmorphic features, short stature, microcephaly, bilateral ptosis, strabismus, mildly enlarged liver, prematurity, congenital heart disease with brain MRI finding of periventricular white matter volume loss with ex vacuo dilatation of the ventricles, thin corpus callosum and hypoplasia of the inferior vermis. Both parents …	Yes	LRP2	c.[3667+1G>A];[5390A>G] [NM_004525.3]	p.[?];[(N1797S)]	Trans	Likely pathogenic/VUS	PVS1;PM2	Donnai-Barrow syndrome (MIM #222448)	Provisional
23	M	4y	Eventration of the diaphragm, Intrauterine growth restriction, delayed speech, intellectual disability, microcephaly, dysmorphic features (large ears, broad long nose, epicanthal folds), short stature, failure to thrive, and undescended testis. Three siblings with microcephaly and intellectual disability.	No	MCPH1	c.[586delC];[586delC] [NM_024596.5]	p.[(Q196Kfs)];[(Q196Kfs)]	Trans	Pathogenic; Pathogenic	PVS1,PM2	Microcephaly 1, primary, autosomal recessive (MIM #251200)	Definitive
24	F	3y	Diaphragmatic hernia, multiple congenital anomalies, global developmental delay, microcephaly, dysmorphic features, cleft palate, hydronephrosis, prematurity, with vermian hypoplasia see on ultrasound.	No	MED12	c.5691_5692delGT [NM_005120.3] (Het)	p.(Y1898Pfs)	De Novo	Pathogenic	PVS1,PS2,PM2	MED12-related disorder (MIM #300895, #305450, #309520)	Provisional
25*[4]	M	1m	Congenital diaphragmatic hernia, congenital heart defects and hypospadia.	Yes	MYRF	c.3239dupA [NM_001127392.3]	p.(E1081Gfs)	De Novo	Likely pathogenic (published)	PVS1,PS2,PM2	Cardiac-urogenital syndrome (MIM #618280)	Definitive
26*[4]	M	14y	Congenital diaphragmatic hernia, ambiguous genitalia, hypospadias, and possible history of horseshoe kidney and hydronephrosis	No	MYRF	c.350_366delinsT [NM_001127392.3]	p.(G117Vfs)	Not Maternal	Likely pathogenic (published)	PVS1,PM2	Cardiac-urogenital syndrome (MIM #618280)	Definitive
27	F	1m	Morgagni diaphragmatic hernia, dysplastic corpus callosum, cerebral migrational anomalies, ventriculomegaly, microcephaly, fetal growth delay, and hiatal hernia.	No	PDHA1	c.1035_1036dupGA [NM_000284.4] (Het)	p.(I346Rfs)	Not Maternal	Pathogenic	PVS1,PM2	Pyruvate dehydrogenase E1-alpha deficiency (MIM #312170)	Definitive
28	M	2m	Congenital diaphragmatic hernia, permaturity, intrauterine growth retardation, patent foramen ovale, and abnormal facial shape.	No	POGZ	c.2849dupC [NM_015100.4]	p.(V951Sfs)	?	Likely pathogenic	PVS1,PM2	White-Sutton syndrome (MIM #616364)	Probable
29	M	4y	Diaphragmatic hernia, delayed motor milestones, delayed speech, intellectual disability, hypotonia, seizure disorder, dysmorphic features, prematurity, intrauterine growth restriction, umbilical hernia, cryptorchidism, and hypospadias with deep cortical culci on brain MRI. Older brother with the same dysmorphic features, developmental delay, and hyperactivity. Several additional similarly affecte…	No	RASA1	c.1103-1G>T [NM_002890.2]	p.?	Paternal	Pathogenic	PVS1,PM2	Capillary malformation-arteriovenous malformation 1(MIM #608354); Partially solved	Definitive
30	M	8y	Diaphragmatic hernia, developmental delay, congenital heart disease (mild aortic dilation, mild aortic regurgitation and a bicuspid aortic valve), transient anemia, and ptosis. Parents are consanguineous	Yes	SLC2A10	c.[67G>A];{67G>A] [NM_030777.4]	p.[(G23S)];[(G23S)]	?	VUS	PP3	Arterial tortuosity syndrome (MIM #208050); Partially solved	Provisional
31	M	18d	Congenital diaphragmatic hernia, dextrocardia, pulmonary hypoplasia, polyhydramnios, cleft palate, macrocephaly, dysmorphic features, microretrognathia, right ventricular hypertrophy, flattened intraventricular septum, tricuspid valve insufficiency, patent foramen ovale, patent ductus arteriosus, hypospadias, cryptorchidism, chordee, transverse palmar crease and hypoplastic nails.	Yes	SMARCA4	c.2936G>A [NM_003072.5]	p.(R979Q)	De Novo	Pathogenic	PS2,PS4,PM2,PP3	Coffin-Siris syndrome 4 (MIM #614609)	Definitive
32	F	7d	Congenital diaphragmatic hernia, double outlet right ventricle with ventricular septal defect and pulmonary valve hypoplasia, right kidney with peripheral cystic dysplasia, 2 vessel cords and questionable fusion of lower lumbar vertebral bodies.	Yes	SMARCC2	c.1651-2A>G [NM_003075.3]	p.?	Not Maternal	VUS	PVS1,PM2	Coffin-Siris syndrome 8 (MIM #618362)	Provisional
					LMX1B	c.904C>T [NM_001174146.2]	p.(Q302*)	Not Maternal	VUS	PVS1	Nail-patella syndrome (MIM #161200)	Provisional
33	M	2m	Hemidiaphragm eventration, respiratory failure, asymmetric ventriculamegaly, hypotonia, hyporeflexia, club feet, cryptorchidism, mild dysmorphic features, ulnar deviation of wrist, and talipes equinovarus.	No	TCF12	c.1808G>A [NM_207036.2]	p.(R603Q)	De Novo	Likely pathogenic	PS2,PM2	Craniosynostosis 3 (MIM #615314)	Probable
34	M	28y	Congenital diaphragmatic hernia, intellectual disability, structural brain abnormalities, hypotonia, hearing loss, optic atrophy, aortic regurgitation, pain insensitivity, bilateral chronic lower leg lymphedema, small penis, undecended testicle, hepatomegaly, enlarged bladder with cyst, hypothyroidism, blateral flat feet, short stature, and blepharophimosis.	No	TRAF7	c.1886G>A [NM_032271.3]	p.(S629N)	De Novo	Likely pathogenic	PS2,PM2	Cardiac, facial, and digital anomalies with developmental delay (MIM #618164)	Probable
35	F	2y	Congenital diaphragmatic hernia, mild delayed motor milestones, axial hypotonia, dysmorphic features (dolichocephaly with slightly shortened neck with nuchal redundancy, scooped nose bridge, blond hair, slightly tented mouth), feeding difficulties, vision loss (bilateral hyperopia), congenital heart disease (sinus venosus atrial septal defect), and kidney abnormalities (nonobstructive nephrolithi…	Yes	ZFPM2	c.757_761dup [NM_012082.3]	p.(C255fs)	?	Pathogenic	PVS1,PM2	Diaphragmatic hernia 3 (MIM #610187)	Definitive
36	M	5m	Congenital diaphragmatic hernia. Family history of congenital diaphragmatic hernia in a brother and sister.	No	ZFPM2	c.1396_1399dup [NM_012082.3]	p.(Y467fs)	Maternal	Pathogenic	PVS1,PS4,PM2	Diaphragmatic hernia 3 (MIM #610187)	Definitive
References
1. Wang X, Charng W-L, Chen C-A, Rosenfeld JA, Al Shamsi A, Al-Gazali L, McGuire M, Mew NA, Arnold GL, Qu C, Ding Y, Muzny DM, Gibbs RA, Eng CM, Walkiewicz M, Xia F, Plon SE, Lupski JR, Schaaf CP, Yang Y. Germline mutations in ABL1 cause an autosomal dominant syndrome characterized by congenital heart defects and skeletal malformations. Nat Genet 2017;49(4):613-17 doi: 10.1038/ng.3815.
2. Thomas E, Lewis AM, Yang Y, Chanprasert S, Potocki L, Scott DA. Novel Missense Variants in ADAT3 as a Cause of Syndromic Intellectual Disability. J Pediatr Genet 2019;8(4):244-51 doi: 10.1055/s-0039-1693151.
3. Zastrow DB, Zornio PA, Dries A, Kohler J, Fernandez L, Waggott D, Walkiewicz M, Eng CM, Manning MA, Farrelly E, Undiagnosed Diseases N, Fisher PG, Ashley EA, Bernstein JA, Wheeler MT. Exome sequencing identifies de novo pathogenic variants in FBN1 and TRPS1 in a patient with a complex connective tissue phenotype. Cold Spring Harb Mol Case Stud 2017;3(1):a001388 doi: 10.1101/mcs.a001388.
4. Rossetti LZ, Glinton K, Yuan B, Liu P, Pillai N, Mizerik E, Magoulas P, Rosenfeld JA, Karaviti L, Sutton VR, Lalani SR, Scott DA. Review of the phenotypic spectrum associated with haploinsufficiency of MYRF. Am J Med Genet A 2019;179(7):1376-82 doi: 10.1002/ajmg.a.61182.
